# Supplementary material
Source: publisher figshare collection journal article supplement (https://acs.figshare.com/ndownloader/files/10399320)
Supplement: Supplementary file 1 [file 10399320]

Compound_ID	SMILES	HDAC1_IC50 (nM)	PI3Kalpha_IC50 (nM)	MV4-11_IC50 (uM)	PC-3_IC50 (uM)	MCF7_IC50 (uM)
17a	NC(N=C4)=NC=C4C1=C2C(N(CCCC(NO)=O)C=N2)=NC(N3CCOCC3)=N1	>9257	12.8 ± 12.0	20.3 ± 2.5	>25	12.9 ± 1.9
17b	NC(N=C4)=NC=C4C1=C2C(N(CCCCC(NO)=O)C=N2)=NC(N3CCOCC3)=N1	1754 ± 299	8.7 ± 4.6	9.81 ± 0.25	18.1 ± 6.1	11.1 ± 2.5
17c	NC(N=C4)=NC=C4C1=C2C(N(CCCCCC(NO)=O)C=N2)=NC(N3CCOCC3)=N1	60 ± 58	9.2 ± 6.3	2.81 ± 0.39	9.28 ± 3.03	7.37 ± 1.40
17d	NC(N=C4)=NC=C4C1=C2C(N(CCCCCCC(NO)=O)C=N2)=NC(N3CCOCC3)=N1	17 ± 9	19.0 ± 0.0	0.25 ± 0.01	2.33 ± 0.46	2.08 ± 0.48
20a	O=C(NO)CCCCCCN2C1=NC(N4CCOCC4)=NC(N3CCOCC3)=C1N=C2	5.55 ± 0.38	>10,000	0.78±0.05	3.60 ± 0.90
20b	O=C(NO)CCCCCN2C1=NC(C4=CC=C(OC)N=C4)=NC(N3CCOCC3)=C1N=C2	12 ± 2	724 ± 156	6.84 ± 2.66	17.4 ± 1.5
20c	O=C(NO)CCCCCCN2C1=NC(C4=CC=C(OC)N=C4)=NC(N3CCOCC3)=C1N=C2	2.9 ± 1.2	>1000	1.99 ± 0.12	8.48 ± 0.32
20d	O=C(NO)CCCCCN2C1=NC(C4=CC=C(N)N=C4)=NC(N3CCOCC3)=C1N=C2	35 ± 8	>10,000	2.39 ± 1.81	6.97 ± 1.23
20e	O=C(NO)CCCCCCN2C1=NC(C4=CC=C(N)N=C4)=NC(N3CCOCC3)=C1N=C2	0.85 ± 0.34	196±26	0.045 ± 0.036	4.01 ± 1.43
20f	O=C(NO)CCCCCCN2C1=NC(C4=CC=CC(CO)=C4)=NC(N3CCOCC3)=C1N=C2	2.7 ± 1.2	50±5	0.047 ± 0.030	1.08 ± 0.82
20g	OCC(C=C4)=CC=C4C1=NC(N3CCOCC3)=C2C(N(CCCCCCC(NO)=O)C=N2)=N1	4.4 ± 5.4	>1000	0.08 ± 0.09	3.64 ± 1.03
20h	NC(N=C4)=NC=C4C1=NC(N3CCOCC3)=C2C(N(CCCCCCC(NO)=O)C=N2)=N1	2.3 ± 1.8	38 ± 27	0.034 ± 0.015	2.26±0.63	0.95 ± 0.69
20i	O=C(NO)CCCCCCN2C1=NC(C4=CC=C(NS(C)(=O)=O)C=C4)=NC(N3CCOCC3)=C1N=C2	1.2±0.8	>1000	0.061 ± 0.006	6.04 ± 1.19
20j	O=C(NO)CCCCCCN2C1=NC(C4=CC=CC(NC(C)=O)=C4)=NC(N3CCOCC3)=C1N=C2	0.78 ± 0.02	>863	0.058 ± 0.003	3.53 ± 0.31
20k	O=C(NO)CCCCCCN2C1=NC(C4=CC=CC(C(N)=O)=C4)=NC(N3CCOCC3)=C1N=C2	0.84 ± 0.29	>924	0.05 9± 0.004	3.47 ± 0.16
20l	O=C(NO)CCCCCCN2C1=NC(C4=CC=C(C(N)=O)C=C4)=NC(N3CCOCC3)=C1N=C2	0.61 ± 0.06	>1000	0.017 ± 0.002	3.02 ± 0.33
20m	O=C(NO)CCCCCCN2C1=NC(C4=CNN=C4)=NC(N3CCOCC3)=C1N=C2	1.7 ± 1.0	>1000	0.31 ± 0.04	2.81 ± 0.16
20n	O=C(NO)CCCCCCN2C1=NC(C4=CC(NN=C5)=C5C=C4)=NC(N3CCOCC3)=C1N=C2	1.4 ± 0.1	>6663	1.36 ± 0.51	7.54 ± 0.15
20o	O=C(NO)CCCCCCN2C1=NC(C4=CN=C(OC)N=C4)=NC(N3CCOCC3)=C1N=C2	2.7 ± 0.4	376	0.062 ± 0.026	2.77 ± 1.00
20p	OC1=C(F)C=CC(C2=NC(N(CCCCCCC(NO)=O)C=N4)=C4C(N3CCOCC3)=N2)=C1	0.49 ± 0.21	619 ± 16	1.81 ± 0.16	5.67 ± 1.03
20q	ONC(CCCCCCN(C=C3)C1=C3C(N2CCOCC2)=NC(C4=CN=C(N)N=C4)=N1)=O	1.5±0.5	25 ± 10	0.044 ± 0.027	1.57 ± 0.69
20r	ONC(CCCCCCN(C=C3)C1=C3C(N2CCOCC2)=NC(C4=CC=CC(O)=C4)=N1)=O	1.6 ± 0.3	41 ± 8	0.13±0.01	1.70 ± 0.57
20s	OC1=C(F)C=CC(C2=NC(N(CCCCCC(NO)=O)C=N4)=C4C(N3CCOCC3)=N2)=C1	8.5 ± 2.5	317 ± 23	7.39±0.41	17.2 ± 2.8
20t	O=C(NO)CCCCCCN(C=N3)C1=C3C(N2CCOCC2)=NC(C4=CC=CC(OCCO)=C4)=N1	0.76 ± 0.65	994±22	0.030 ± 0.008	1.68 ± 1.12
20u	O=C(NO)CCCCCCN(C=N3)C1=C3C(N2CCOCC2)=NC(C4=CC(OCCO)=C(F)C=C4)=N1	3.7 ± 1.4	6439±180	1.88 ± 0.14	4.69 ± 0.70
20v	O=C(NO)CCCCCCN(C=N3)C1=C3C(N2CCOCC2)=NC(C4=CC(CO)=C(OC)C=C4)=N1	0.89 ± 0.41	218 ± 14	0.38 ± 0.06	2.00 ± 0.17
23a	O=C(NO)CCCCCCN2C1=NC(C4=CN=C(N)N=C4)=NC(N3CCC(CO)CC3)=C1N=C2	0.99 ± 0.35	1041 ± 203	0.17 ± 0.05	1.94 ± 0.19	2.56 ± 1.58
23b	O=C(NO)CCCCCCN2C1=NC(C4=CN=C(N)N=C4)=NC(N3CCC(O)CC3)=C1N=C2	0.69 ± 0.10	3955 ± 1688	0.13 ± 0.03	1.68 ± 0.74	1.21 ± 0.48
29	O=C(NO)/C=C/C(C=C5)=CC=C5CNCCN2C1=NC(C4=CC=C(OC)N=C4)=NC(N3CCOCC3)=C1N=C2	84 ± 40	>8956	0.24±0.07	1.72±0.81
31	O=C(NO)/C=C/C(C=C5)=CC=C5CNCCN2C1=NC(C4=CN=C(N)N=C4)=NC(N3CCOCC3)=C1N=C2	136 ± 10	307±57	5.44±1.73	>25
34	COC(C=C4)=NC=C4C1=NC(N2CCOCC2)=C3C(N(CCNCC5=CC=C(C(NO)=O)C=C5)C=N3)=N1	1082 ± 192	4543±1136	5.78±0.64	18.5±6.3
vorinostat	O=C(CCCCCCC(NO)=O)NC1=CC=CC=C1	50 ± 30		0.43 ± 0.10	3.07 ± 1.08	1.60 ± 0.31
pictilisib	O=S(N(CC6)CCN6CC2=CC1=NC(C4=CC=CC5=NNC=C45)=NC(N3CCOCC3)=C1S2)(C)=O		18.7 ± 8.6	1.46 ± 1.09	0.75 ± 0.36	0.22 ± 0.18
